# Supplementary material for: An enhanced SPR optical fiber biosensor using Ti3C2Tx MXene/AuNPs for label-free and sensitive detection of human IgG
Source: Royal Society of Chemistry journal article supplement (doi:10.1039/d4nr01883d), 2024-01-01
Supplement: d4nr01883d1.pdf [file d4nr01883d1.pdf]

## **Enhanced SPR Optical Fiber Biosensor using $Ti_3C_2T_x$ MXene/AuNPs for Label-Free and Sensitive Detection of Human IgG**

Jiayi Zhu,<sup>a,§</sup> Chao Zhao,<sup>a,§</sup> Binyun Xia,<sup>a</sup> Ning Wang,<sup>\*a</sup> Xi Chen,<sup>\*b</sup> Xinyue Jing,<sup>a</sup>

Minxuan Chen<sup>a</sup> and Xinrui Xu<sup>a</sup>

<sup>a</sup> National Engineering Research Center of Fiber Optic Sensing Technology and Networks,  
Wuhan, 430070, China;

<sup>b</sup> Department of Orthopedics Trauma and Microsurgery, Zhongnan Hospital of Wuhan  
University, Wuhan, Hubei, 430071, China

<sup>§</sup>The authors contribute equally.

\*Corresponding author; Email address: [ningwang23@whut.edu.cn](mailto:ningwang23@whut.edu.cn), [jjchen0908@hotmail.com](mailto:jjchen0908@hotmail.com)

### **SUPPORTING INFORMATION**

#### **Content**

- 1. Characterization of layers on fiber**
- 2. Distribution of AuNPs size**
- 3. The FWHM and FOM as the function of immersion time in  $Ti_3C_2T_x$  MXene solution (corresponding to the different thicknesses of  $Ti_3C_2T_x$  MXene layer on the fiber)**
- 4. The influence of the environmental temperature on detection**

## 1. Characterization of layers on fiber

Fig. S1 displays the SEM image of the fiber's surface and cross-section. When varying the immersion time (25 min, 80 min, 120 min, and 180 min), the  $Ti_3C_2T_x$  MXene thickness was also observed to be successively 76 nm, 119 nm, 149 nm, and 170 nm.

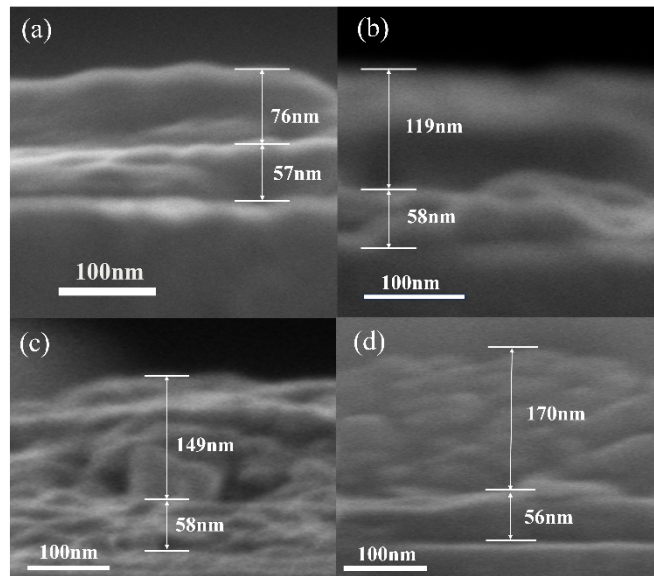

**Fig. S1** SEM images of the  $Ti_3C_2T_x$  MXene coated on the SPR-OFSs with the different immersion times (a) 25 min, (b) 80 min, (c) 120 min, and (d) 180 min.

## 2. Distribution of AuNPs size

To clarify the size of AuNPs, statistical analysis was conducted and their distribution was plotted in Fig. S2. It shows that most of the AuNPs exhibit a size of about 16.6 nm and their average particle size is about 16.7 nm, which closely matches the theoretically predicted 17 nm.

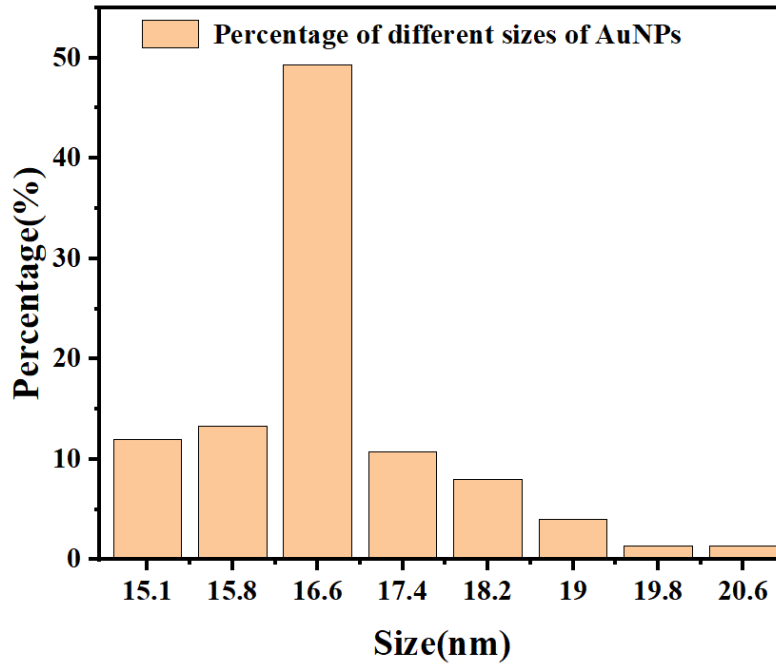

Fig.S2 The distribution of AuNPs on the fiber.

**3. The FWHM and FOM as the function of immersion time in  $Ti_3C_2T_x$  MXene solution (corresponding to the different thicknesses of  $Ti_3C_2T_x$  MXene layer on the fiber)**

The FWHM and FOM of the SPR-OFSs were obtained by measuring their SPR resonance spectrum and the experiments were repeated three times. Fig. S3 plotted the results that the maximum FOM ( $18.1 \text{ RIU}^{-1}$ ,  $18.2 \text{ RIU}^{-1}$ , and  $18 \text{ RIU}^{-1}$ ) was measured repeatedly three times at the immersion time of 40 min.

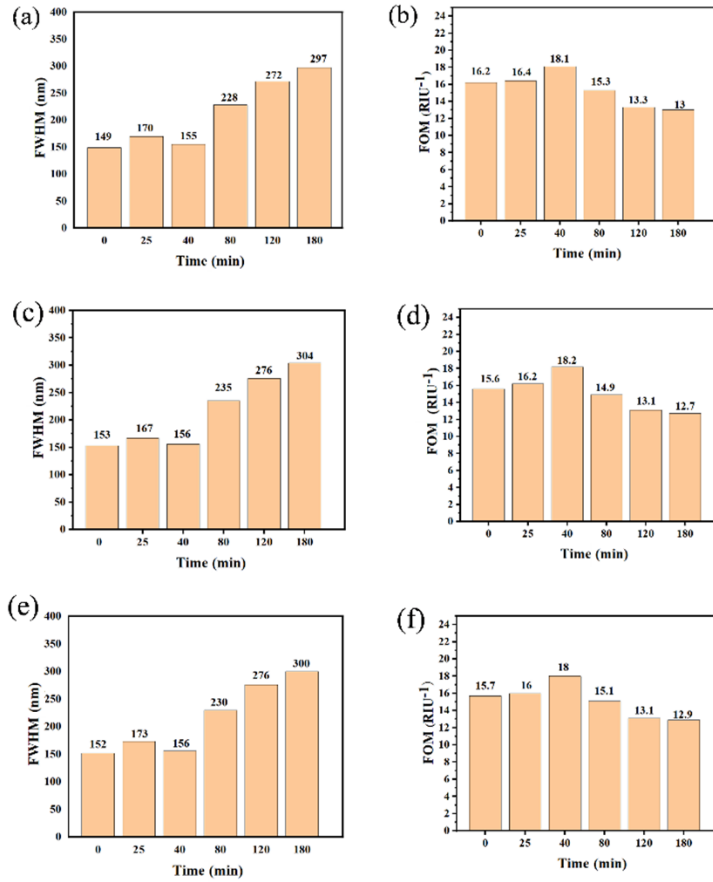

**Fig. S3** The FWHM (a, c, e) and FOM (b, d, f) of SPR-OFS obtained at different  $Ti_3C_2T_x$  MXene thicknesses.

#### 4. The influence of the environmental temperature on detection

the SPR-OFS was placed in an electrothermal constant temperature blast drying oven (DHG-9123A) for 120 min to detect the human IgG solution sample of 10  $\mu\text{g/mL}$ . Subsequently, the temperature was adjusted to 20°C, allowing the desiccator to equilibrate, and transmission spectra were recorded at 10 min intervals. The temperature was then incrementally increased by 10°C each time until reaching 50°C, with wavelength changes in the transmission spectrum plotted over temperature. The

same procedure was carried out using human IgG concentrations of 20  $\mu\text{g/mL}$  and 30  $\mu\text{g/mL}$ .

Fig. S4(a) shows that the SPR-OFS detects human IgG within a temperature range of 20 to 50 $^{\circ}\text{C}$ , with wavelength changes stable at 17 nm, 34 nm, and 46 nm respectively. The maximum fluctuation is less than 0.3 nm. Fig. S4(b) displays the wavelength changes of SPR-OFS in detecting human IgG at room temperature (25 $^{\circ}\text{C}$ ) and 37 $^{\circ}\text{C}$ . The results exhibit small differences, and it indicates that temperature has a negligible impact on the detection by using the proposed sensor here.

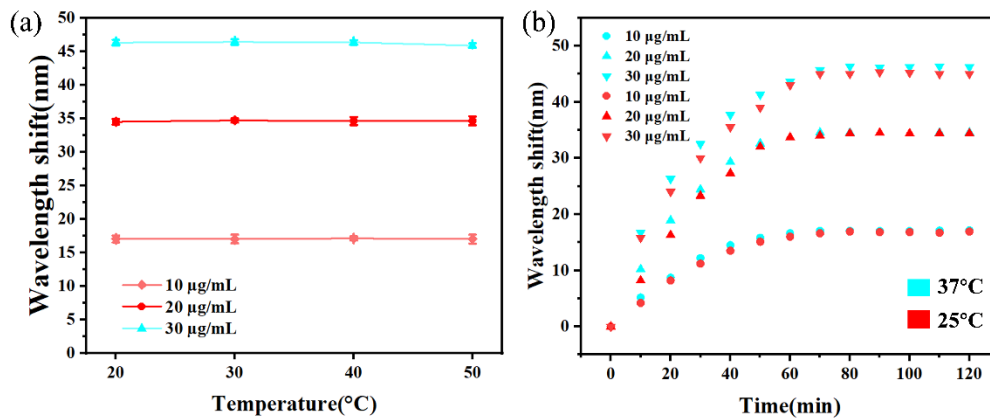

**Fig. S4** (a) The wavelength shift of fiber optic SPR sensors when changing the testing temperature and the concentrations (10  $\mu\text{g/mL}$ , 20  $\mu\text{g/mL}$ , 30  $\mu\text{g/mL}$ ) of human IgG sample. (b) The detection at 37 $^{\circ}\text{C}$  and room temperature (25 $^{\circ}\text{C}$ ).
